# Supplementary material
Source: Springer Nature journal article supplement (https://mijn.bsl.nl/resource/supplementary/13047_2010_117_MOESM2_ESM.pdf/7110094)

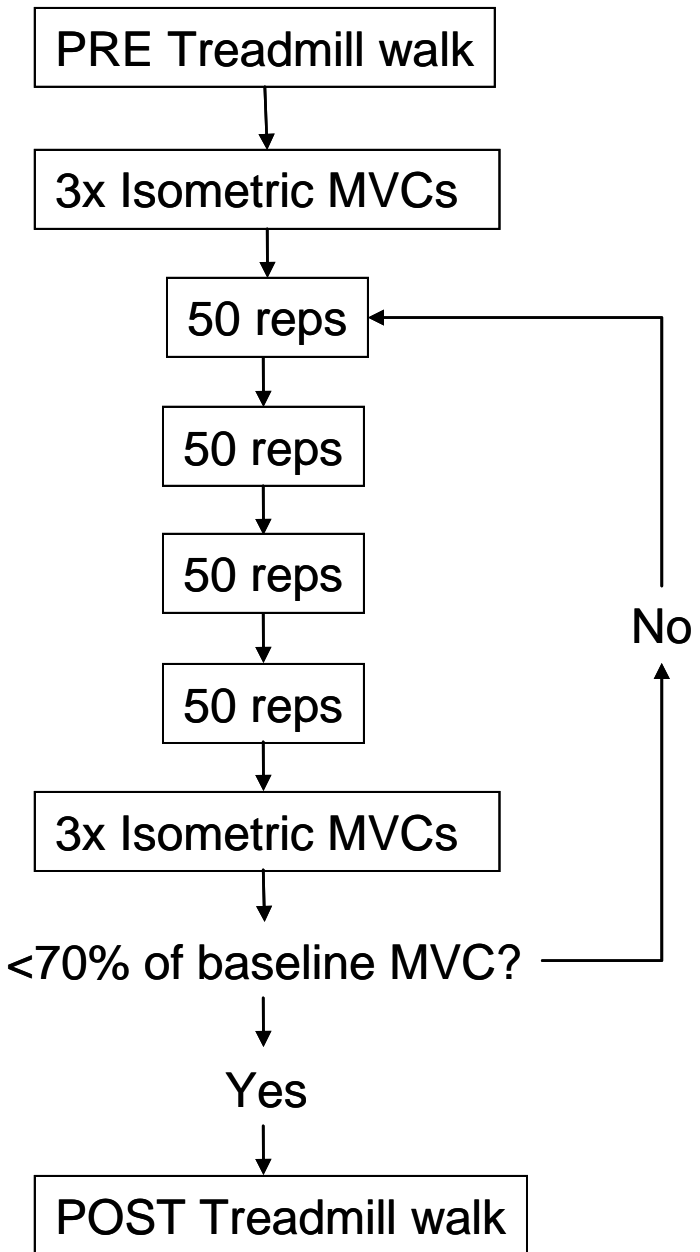

Supplement: MOESM2 [file 7110094]
